# Supplementary material for: Antigenically intact hemagglutinin in circulating avian and swine influenza viruses and potential for H3N2 pandemic
Source: PubMed Central journal article supplement — Sci Rep. 2013 May 10;3:1822. doi: 10.1038/srep01822 (PMC3650665; doi:10.1038/srep01822), 2013-05-10

# **Antigenically intact hemagglutinin in circulating avian and swine influenza viruses and potential for H3N2 pandemic**

Kannan Tharakaraman, Rahul Raman, Viswanathan Sasisekharan, Karthik Viswanathan, Nathan W Stebbins, Ram Sasisekharan

## SUPPLEMENTARY FIGURES

**Figure S1. Phylogeny tree of 1968 pandemic HA and selected seasonal vaccine, avian and swine H3 HAs.** Human isolates are labeled in red; remaining isolates are labeled in blue. When compared to seasonal HAs, the avian and swine HAs are closer to the 1968 pandemic HA reflecting the archival nature in those species.

**Figure S2. N-linked glycosylation and antigenic drift of A/H3N2 HA.** The influence of N-linked glycosylation on the antigenic drift was captured by changes in the AI values of the individual antigenic regions (**a-e**) before and after the accumulation of glycosylation sites. Glycosylation sites that protect region A appeared in 1996 (at positions 122 & 133) and 1999 (at position 144); glycosylation site that protects region E appeared in 1974 (at position 63). Upward pointing arrows are drawn to indicate these time periods on the X-axis.

Figure S1.

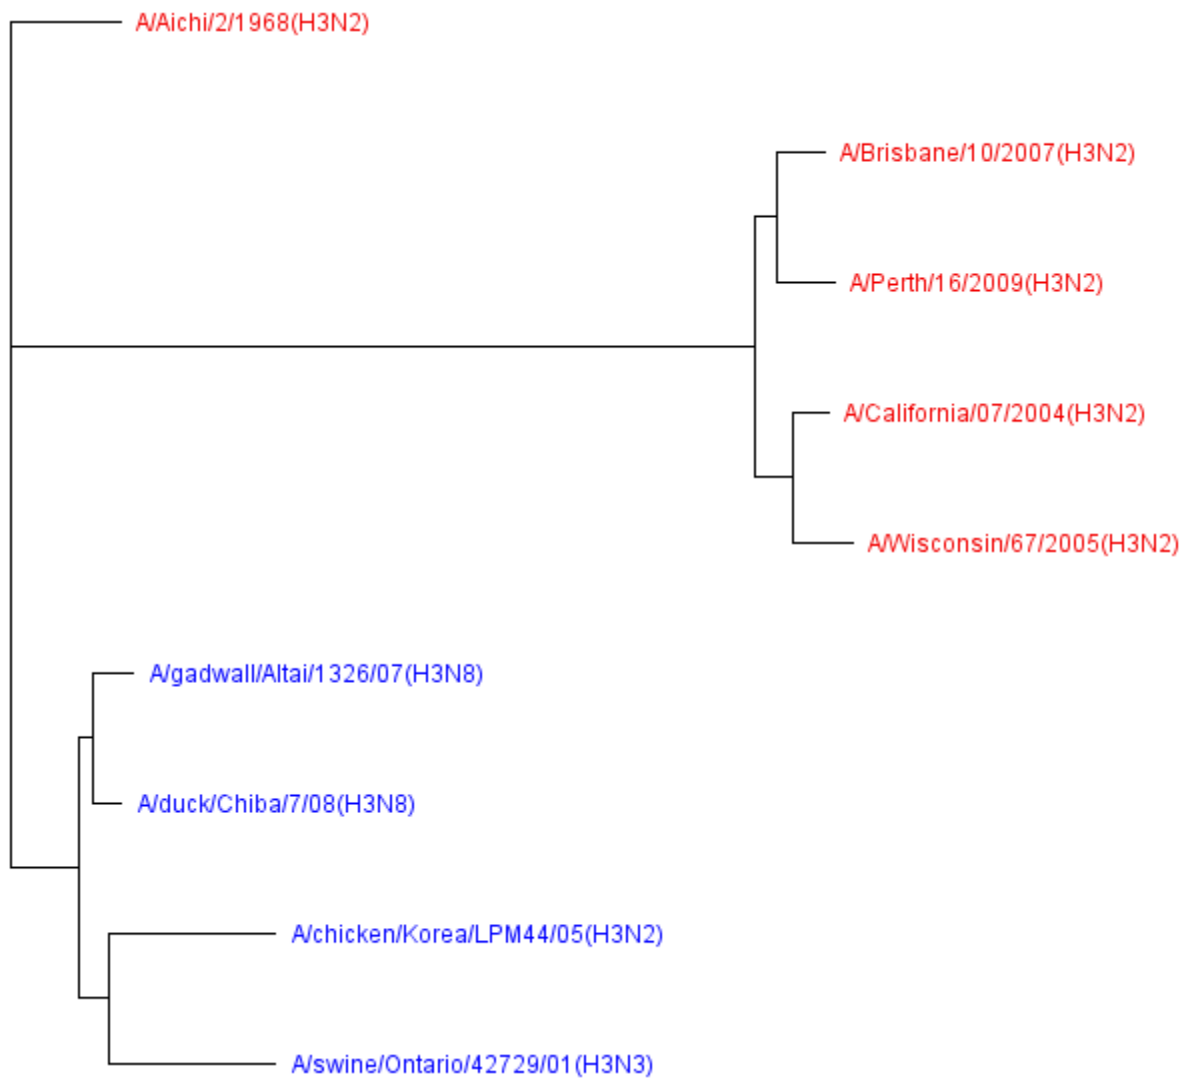

Figure S2.

a

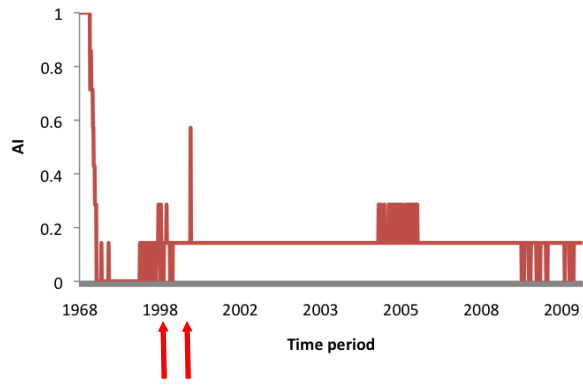

b

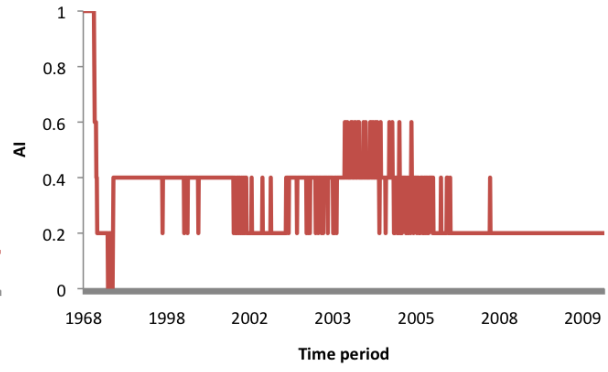

c

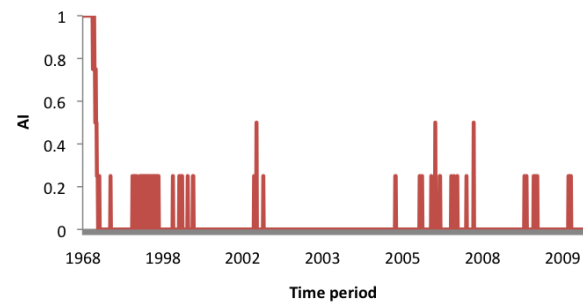

d

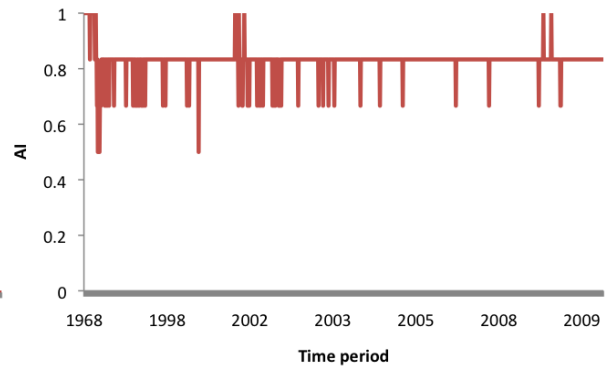

e

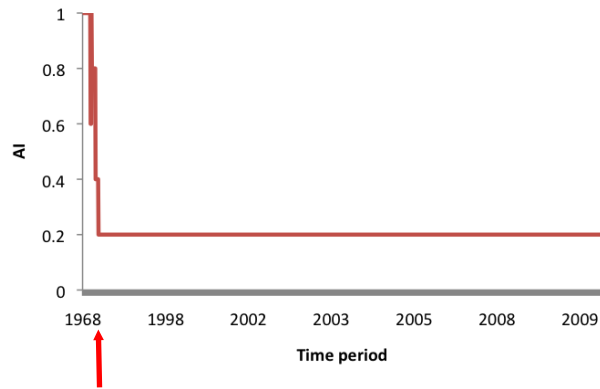

Supplement: srep01822-s1.pdf [file srep01822-s1.pdf]
